# Supplementary material for: Changes in drought features at the European level over the last 120 years
Source: Copernicus journal article supplement (doi:10.5194/nhess-21-1685-2021), 2021-05-31
Supplement: Supplementary file 1 [file nhess-21-1685-2021-supplement.pdf]

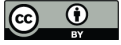

*Supplement of*

## **Changes in drought features at the European level over the last 120 years**

**Monica Ionita and Viorica Nagavciuc**

*Correspondence to:* Monica Ionita ([monica.ionita@awi.de](mailto:monica.ionita@awi.de))

The copyright of individual parts of the supplement might differ from the article licence.

## Supplement

To analyze if there are significant changes in the SPEI12, SPI12, scPDSI (Figure1 and Figure S2), PP, TT and PET (Figure S3) and the drought area (Figures 3 - 5) we have used the rank-based non-parametric Mann-Kendall (M-K) test and Spearman's Rho (Mann, 1945; Kendall, 1948), which are less sensitive to outliers than parametric statistics. To avoid the influence of serial persistence on M-K test results, the modified M-K (MMK) trend test was used, using the computation algorithm discussed by Hamed and Rao (1998).

**Table S1.** Linear trends of the drought area for different drought types (moderate, severe and extreme) for SPEI12, SPI12 and scPDSI for the three analyzed regions: MED, CEU and NEU.

|            | SPEI12                 |                       |                         | SPI12                  |                       |                         | scPDSI                 |                       |                         |
|------------|------------------------|-----------------------|-------------------------|------------------------|-----------------------|-------------------------|------------------------|-----------------------|-------------------------|
|            | Moderate <sup>i)</sup> | Severe <sup>ii)</sup> | Extreme <sup>iii)</sup> | Moderate <sup>i)</sup> | Severe <sup>ii)</sup> | Extreme <sup>iii)</sup> | Moderate <sup>i)</sup> | Severe <sup>ii)</sup> | Extreme <sup>iii)</sup> |
| <b>MED</b> | ↑*                     | ↑*                    | ↑*                      | ↑                      | ↑                     | ↑                       | ↑*                     | ↑*                    | ↑*                      |
| <b>CEU</b> | ↑*                     | ↑*                    | ↑*                      | ↓                      | ↓                     | ↓                       | ↑*                     | ↑*                    | ↑*                      |
| <b>NEU</b> | ↓*                     | ↓*                    | ↓                       | ↓*                     | ↓*                    | ↓*                      | ↓*                     | ↓*                    | ↓*                      |

↑\* - indicates a significant positive trend (99% significance level);

↑ - indicates a positive, but not significant trend;

↓\* - indicates a significant negative trend (99% significance level);

↓ - indicates a negative, but not significant trend;

i) moderate drought (SPI/SPEI values between -1 and -1.5 and scPDSI values between -2 and -3);

ii) severe drought (SPI/SPEI values between -1.5 and -2 and scPDSI values between -3 and -4);

iii) extreme drought (SPI/SPEI values less than -2 and scPDSI values smaller than -4).

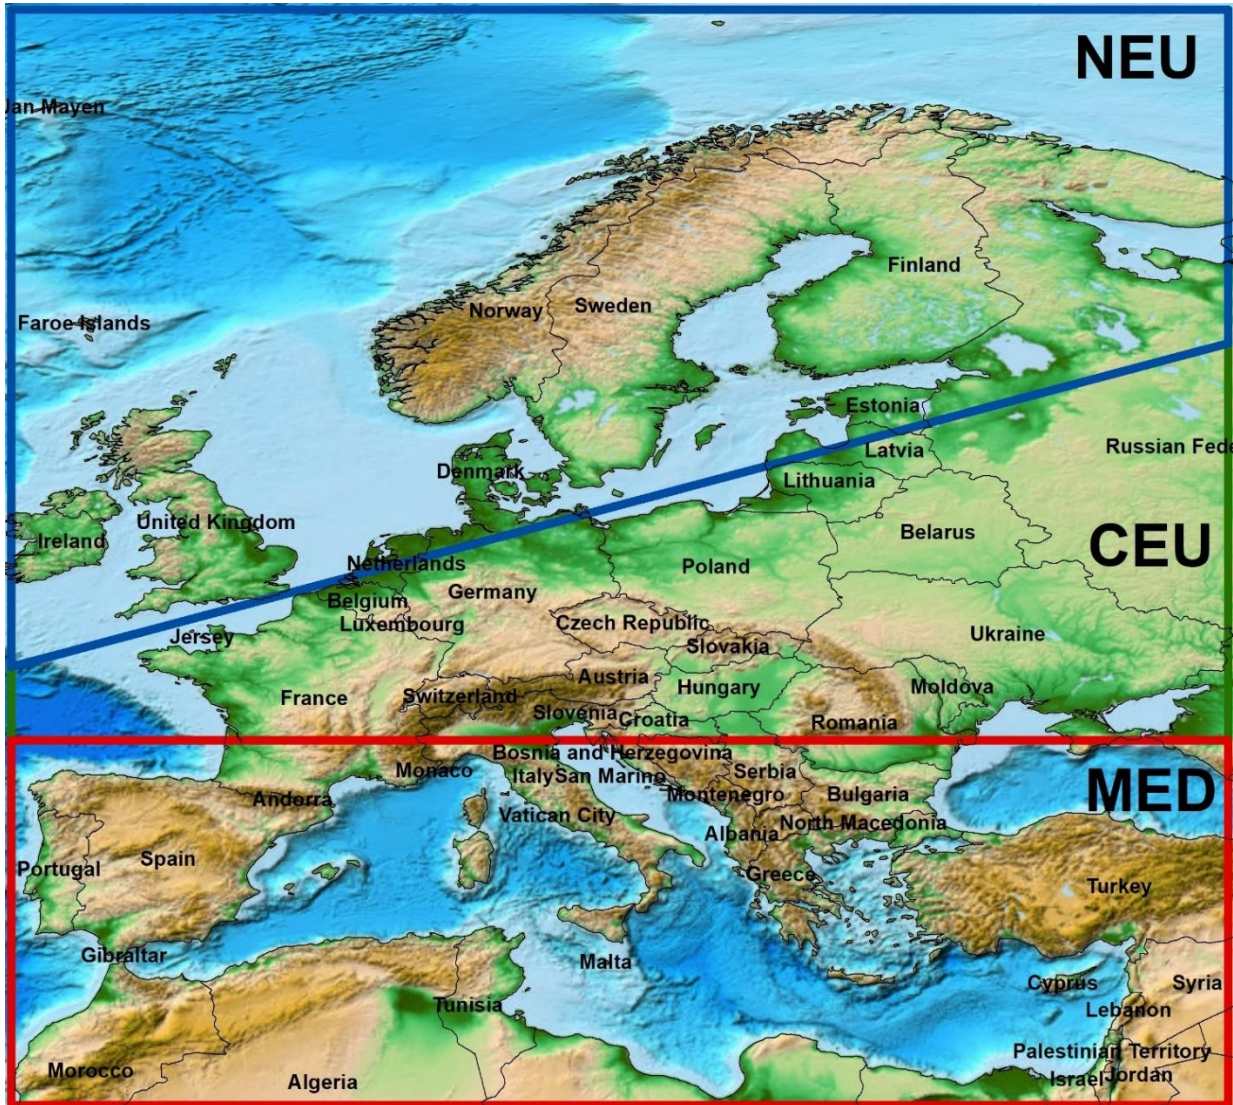

**Figure S1.** Spatial delimitation of the macro regions analyzed in this study: South Europe/ Mediterranean region (MED); Central Europe (CEU) and North Europe (NEU). Data source for the digital elevation model: (NOAA, 2009).

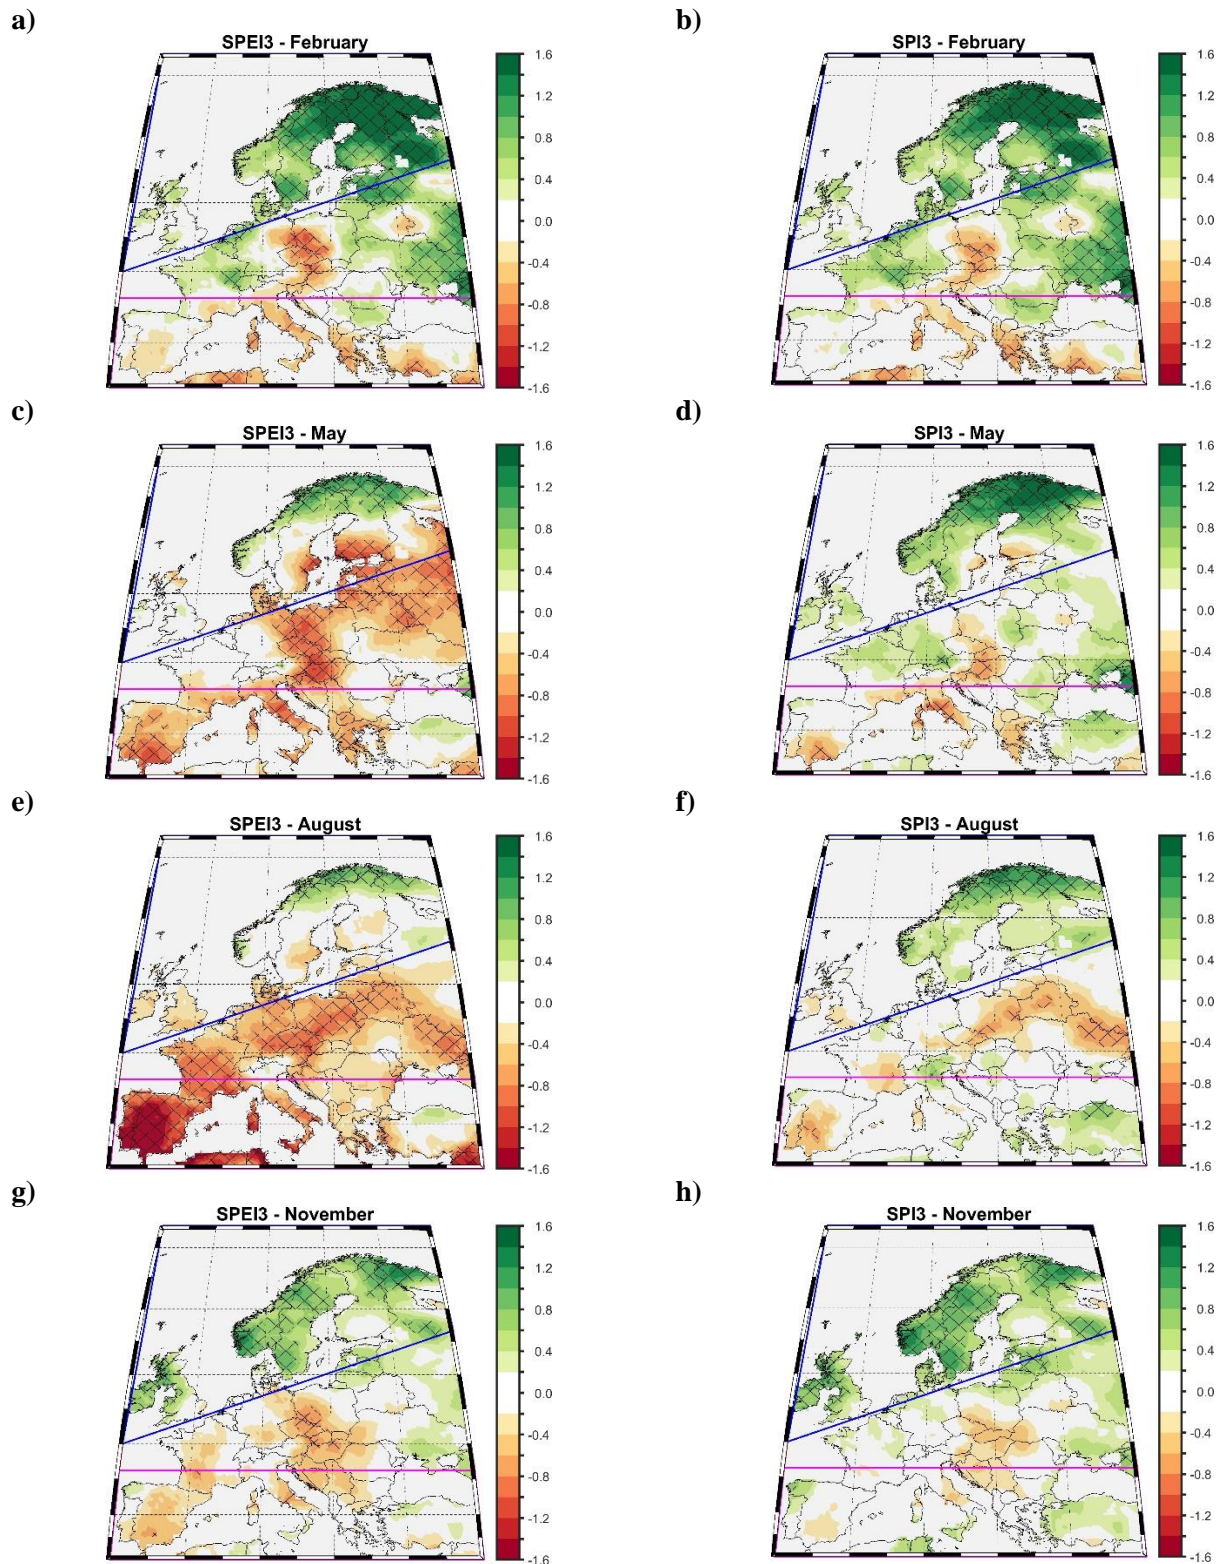

**Figure S2.** a) Linear trend of February SPEI3; b) as in a) but for SPI3; c) linear trend of May SPEI3; d) as in c) but for SPI3; e) linear trend of August SPEI3; f) as in e) but for SPI3; g) linear trend of SPEI3 November and h) as in g) but for SPI3. Stipples indicate statistically significant trends. Analyzed period 1902 – 2019. Units: z-scores/ 118 years.

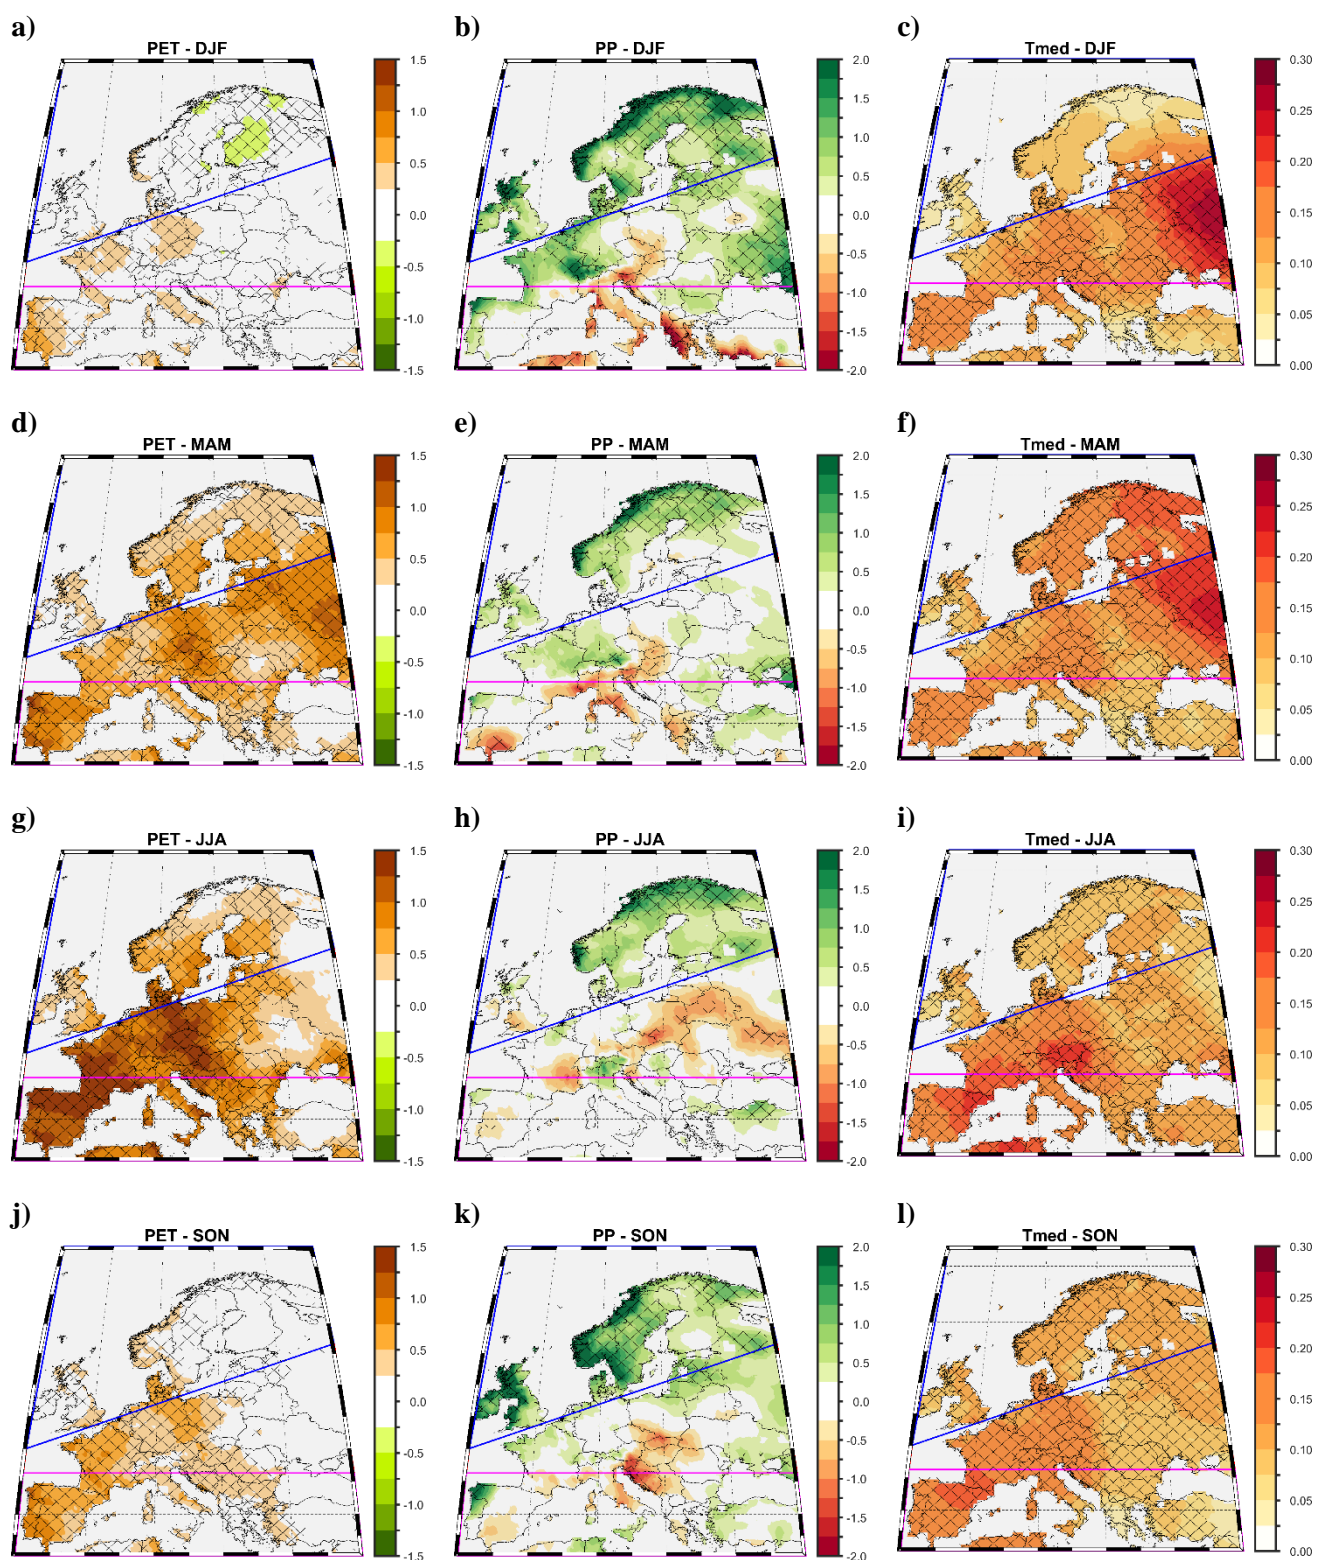

**Figure S3.** a) Linear trend of winter (DJF) potential evapotranspiration (PET); b) as in a) but for the winter (DJF) precipitation (PP); c) as in a) but for the winter (DJF) mean air temperature (TT); d) as in a) but for spring (MAM); e) as in b) but for spring (MAM); f) as in c) but for spring (MAM); g) as in a) but for summer (JJA); h) as in b) but for summer (JJA); i) as in c) but for summer (JJA); j) as in a) but for autumn (SON); k) as in b) but for autumn (SON) and l) as in c) but for autumn (SON). Stipples indicate statistically significant trends. Analyzed period 1902 – 2019. Units: PET (mm/decade), PP (mm/decade) and TT (°C/decade).

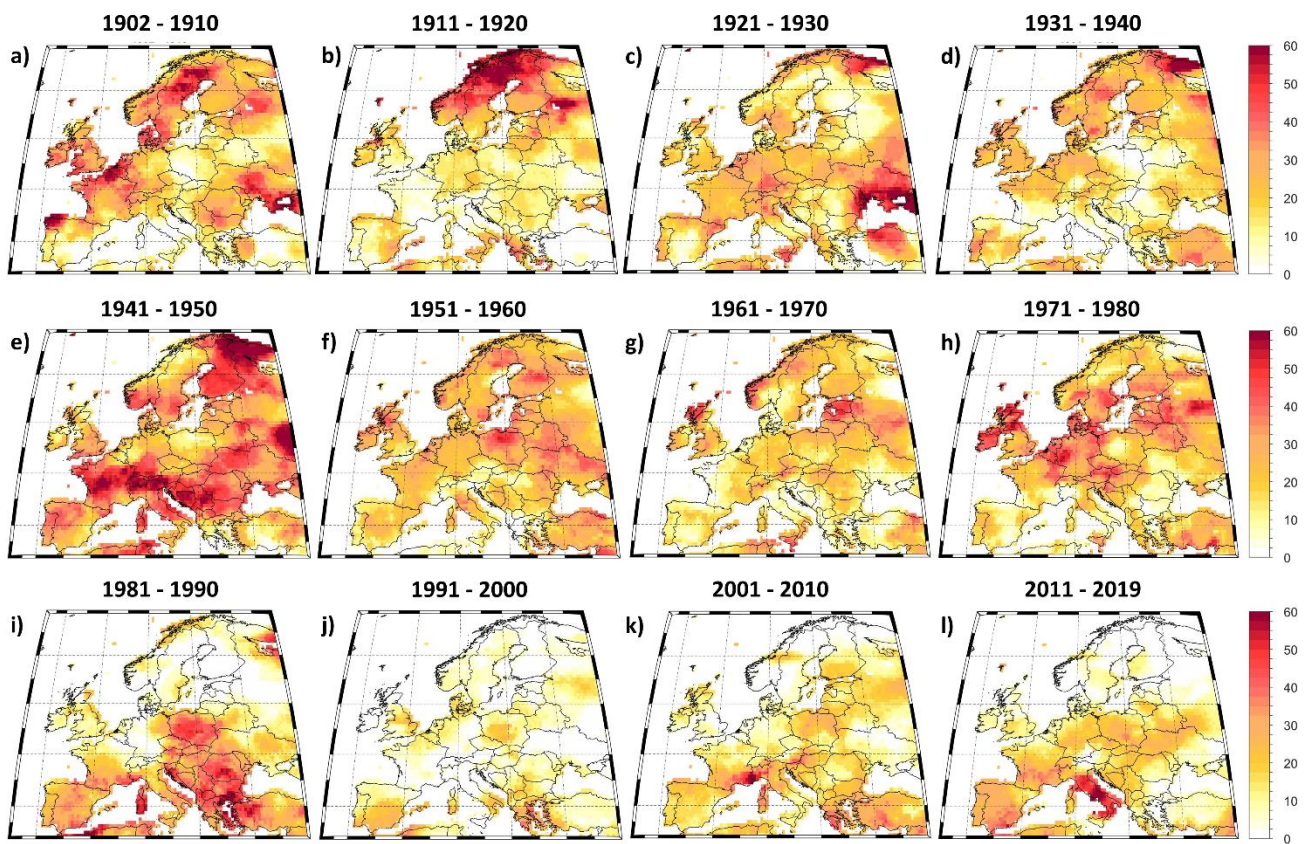

**Figure S4.** Decadal frequency of drought duration for **moderate drought** (SPI12 between -1.0 and -1.5): a) 1902 – 1901; b) 1911 – 1920; c) 1921 – 1930; d) 1931 – 1940; e) 1941 – 1950; f) 1951 – 1960; g) 1961 – 1970; h) 1971 – 1980; i) 1981 – 1990; j) 1991 – 2000; k) 2001 – 2010 and l) 2011 – 2019. Units: number of months/period.

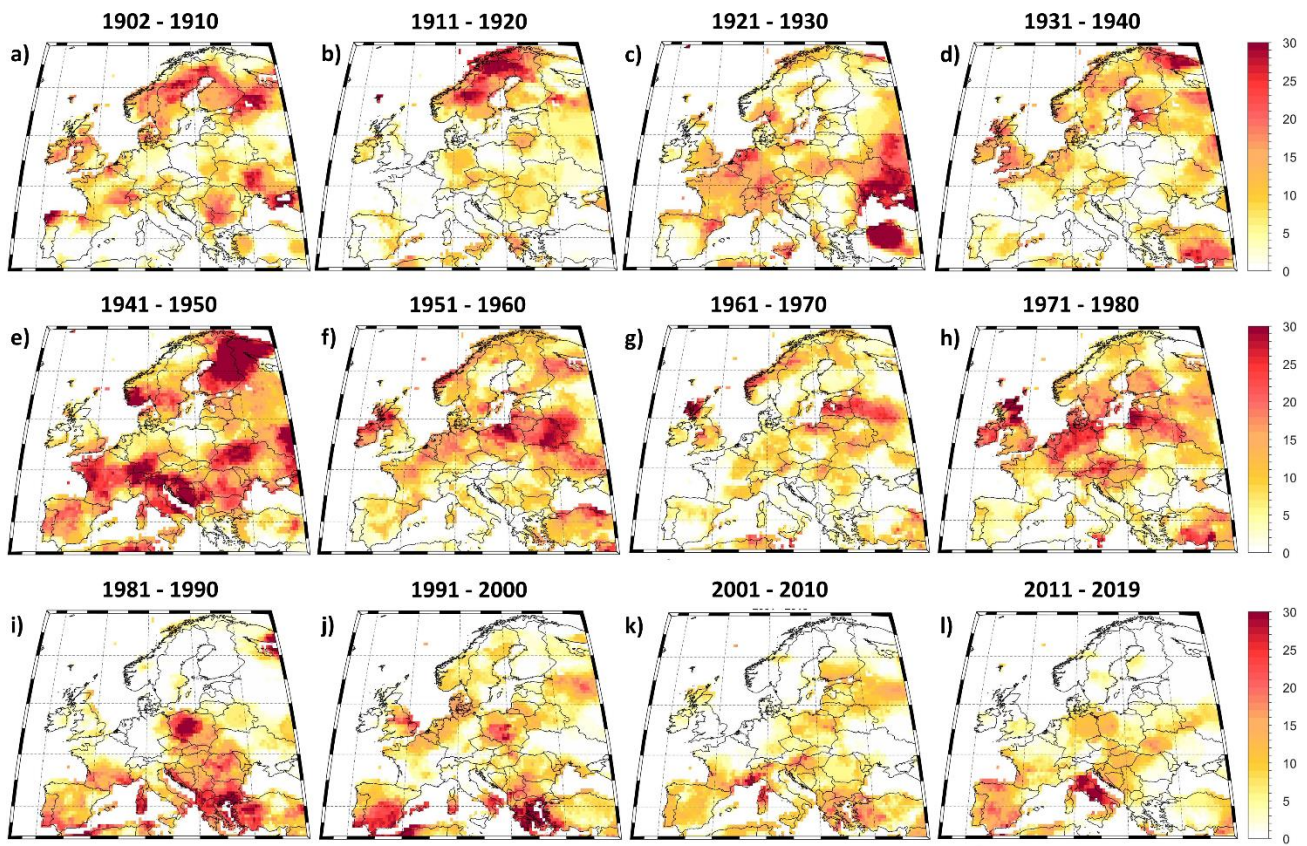

**Figure S5.** Decadal frequency of drought duration for **severe drought** (SPI12 between -1.51 and -2): a) 1902 – 1901; b) 1911 – 1920; c) 1921 – 1930; d) 1931 – 1940; e) 1941 – 1950; f) 1951 – 1960; g) 1961 – 1970; h) 1971 – 1980; i) 1981 – 1990; j) 1991 – 2000; k) 2001 – 2010 and l) 2011 – 2019. Units: number of months/period.

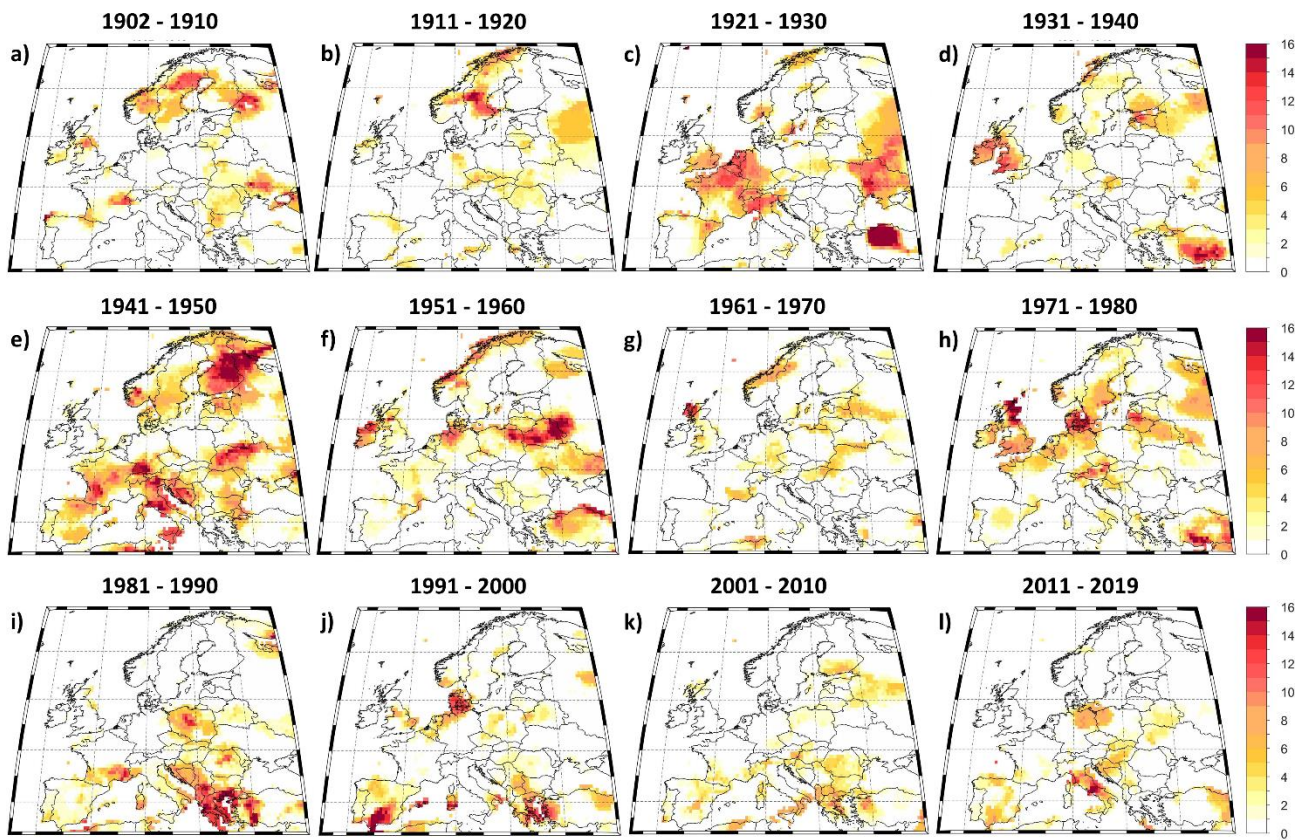

**Figure S6.** Decadal frequency of drought duration for **extreme drought** (SPI12<-2): a) 1902 – 1901; b) 1911 – 1920; c) 1921 – 1930; d) 1931 – 1940; e) 1941 – 1950; f) 1951 – 1960; g) 1961 – 1970; h) 1971 – 1980; i) 1981 – 1990; j) 1991 – 2000; k) 2001 – 2010 and l) 2011 – 2019. Units: number of months/period.



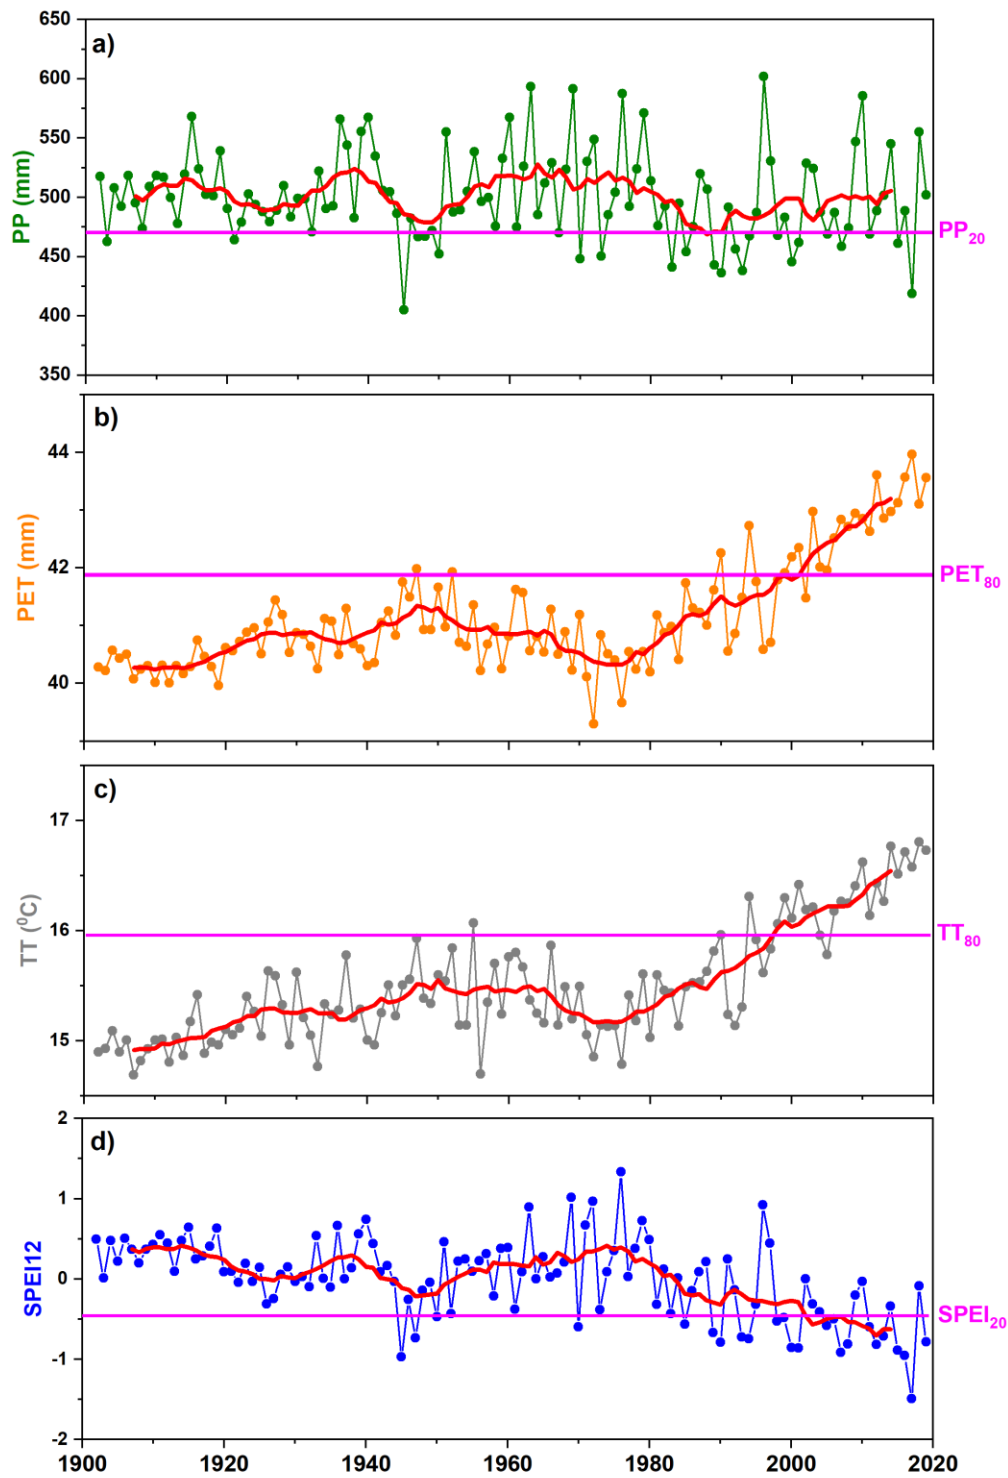

**Figure S7.** a) Time series of the annual precipitation (PP) averaged over MED; b) as in a) but for the potential evapotranspiration (PET); c) as in a) but for mean air temperature (TT) and d) as in a) but for SPEI12. The red line in a) – d) indicates the 21 years running mean.

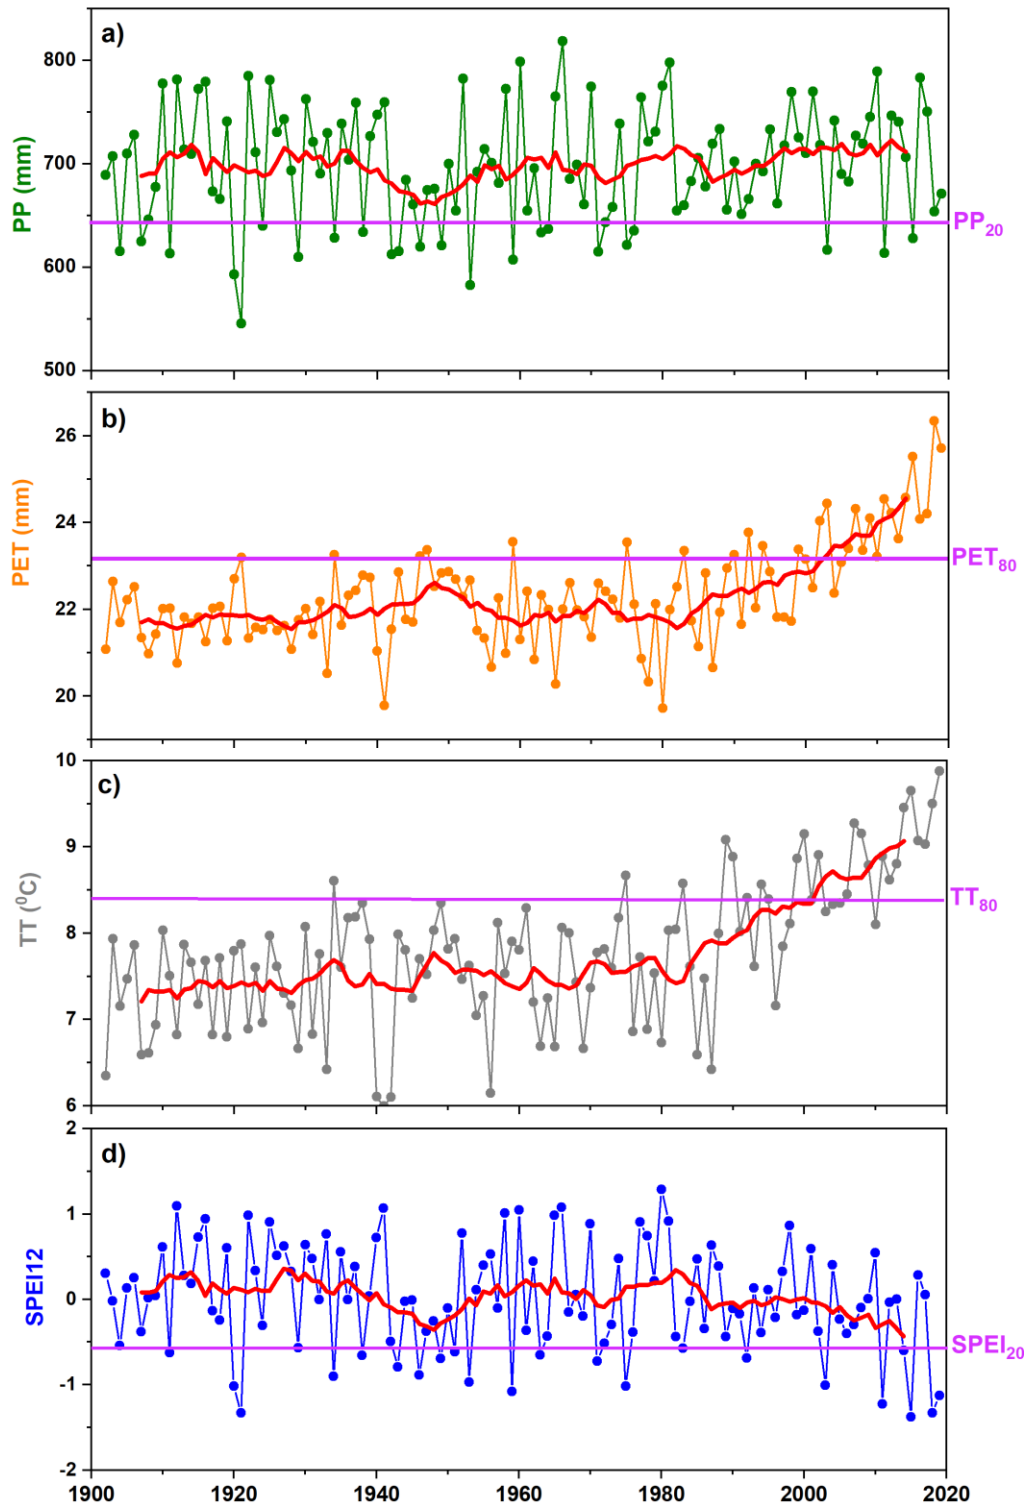

**Figure S8.** a) Time series of the annual precipitation (PP) averaged over CEU; b) as in a) but for the potential evapotranspiration (PET); c) as in a) but for mean air temperature (TT) and d) as in a) but for SPEI12. The red line in a) – d) indicates the 21 years running mean.

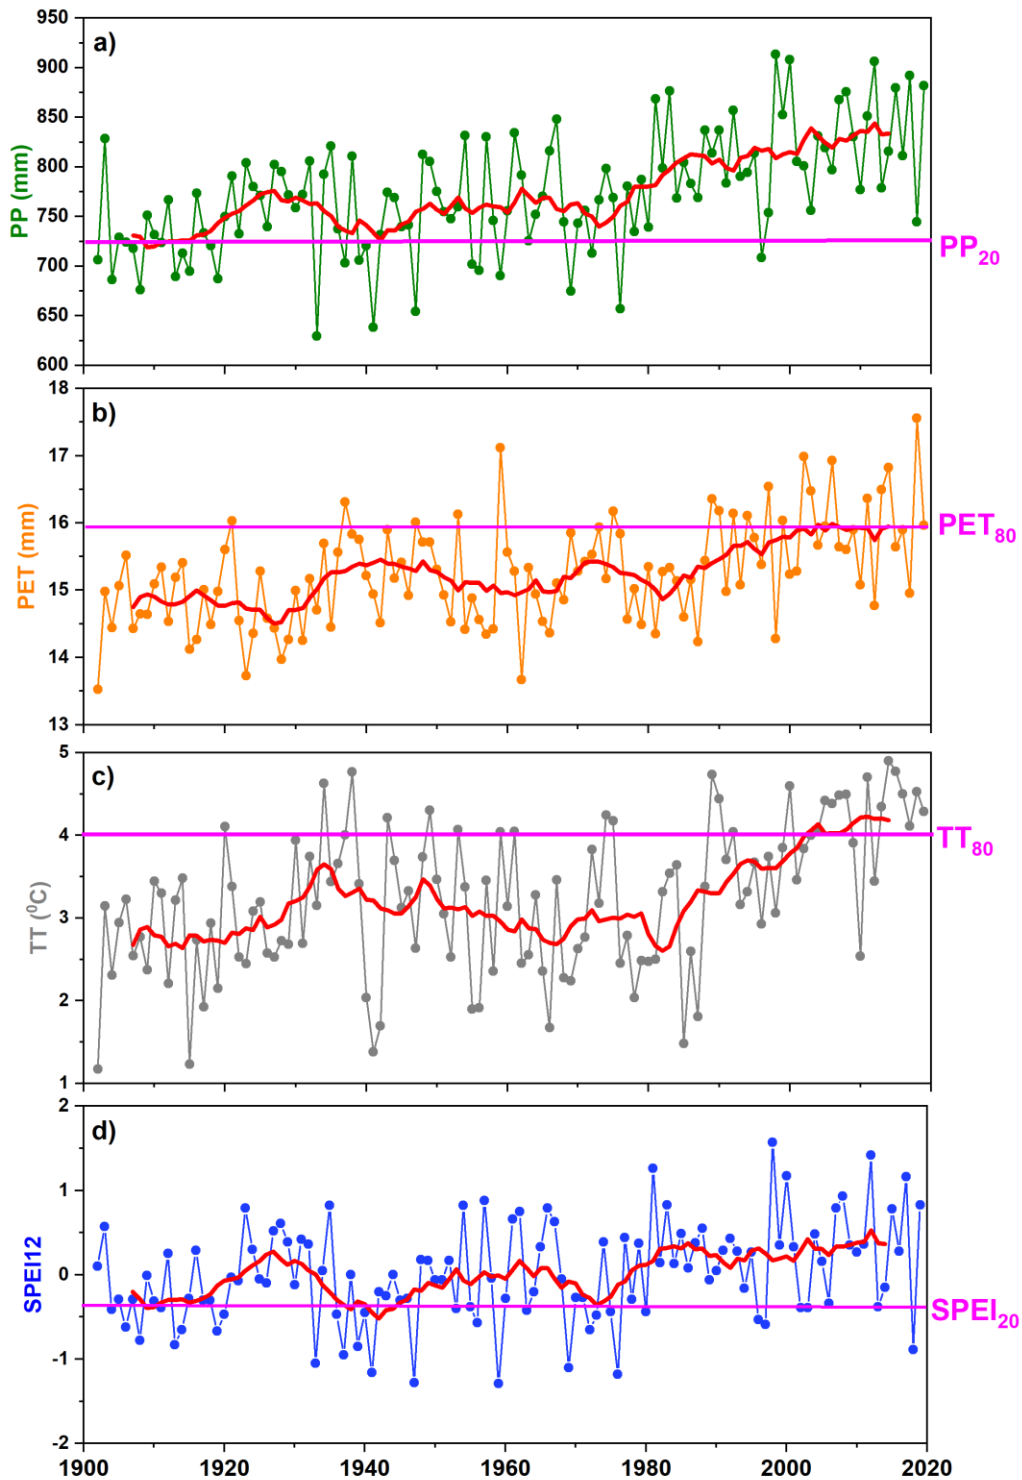

**Figure S9.** a) Time series of the annual precipitation (PP) averaged over MED; b) as in a) but for the potential evapotranspiration (PET); c) as in a) but for mean air temperature (TT) and d) as in a) but for SPEI12. The red line in a) – d) indicates the 21 years running mean.

a)

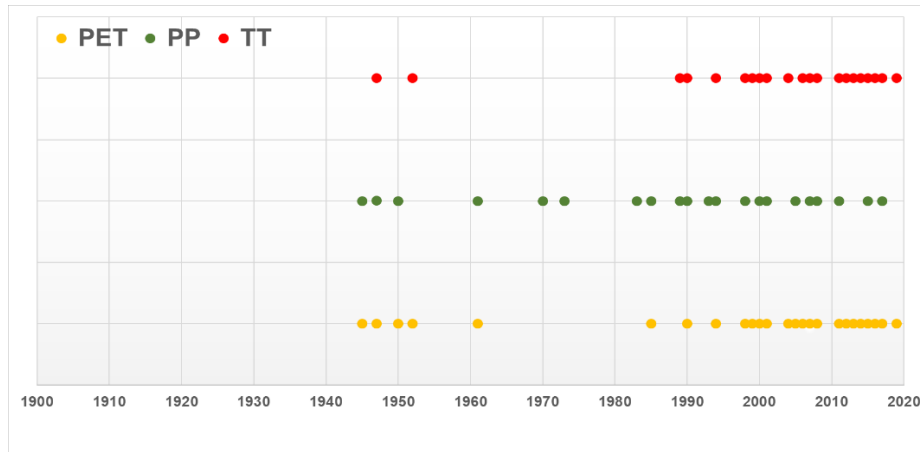

b)

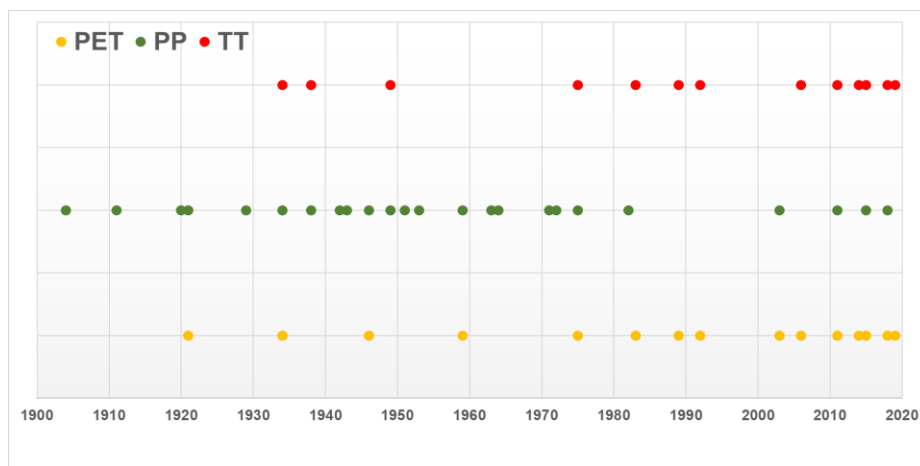

c)

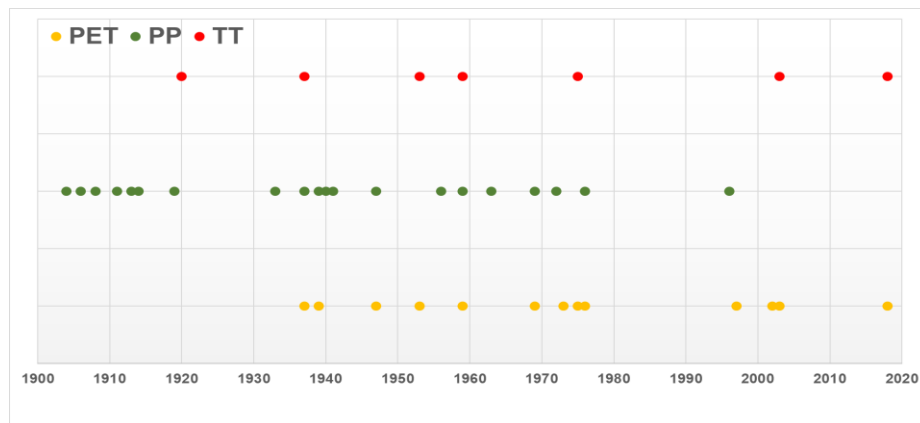

**Figure S10.** a) Occurrence of warm and dry events ( $TT_{75}/SPEI12_{25}$  – red dots), low precipitation and dry events ( $PP_{25}/SPEI12_{25}$  – green dots) and enhanced evaporation and dry events ( $PET_{75}/SPEI12_{25}$  – yellow dots) for MED area; b) as in a) but for CEU and c) as in a) but for NEU.  $TT_{75}/SPEI12_{25}$  indicates that we took into account the common years when the temperature was higher than the 75<sup>th</sup> percentile and SPEI12 was smaller than the 25<sup>th</sup> percentile.  $PP_{25}/SPEI12_{25}$  indicates that we took into account the common years when the precipitation was smaller than the 25<sup>th</sup> percentile and SPEI12 was smaller than the 25<sup>th</sup> percentile.  $PET_{75}/SPEI12_{25}$  indicates that we took into account the common years when the potential evapotranspiration was higher than the 75<sup>th</sup> percentile and SPEI12 was smaller than the 25<sup>th</sup> percentile.

a)

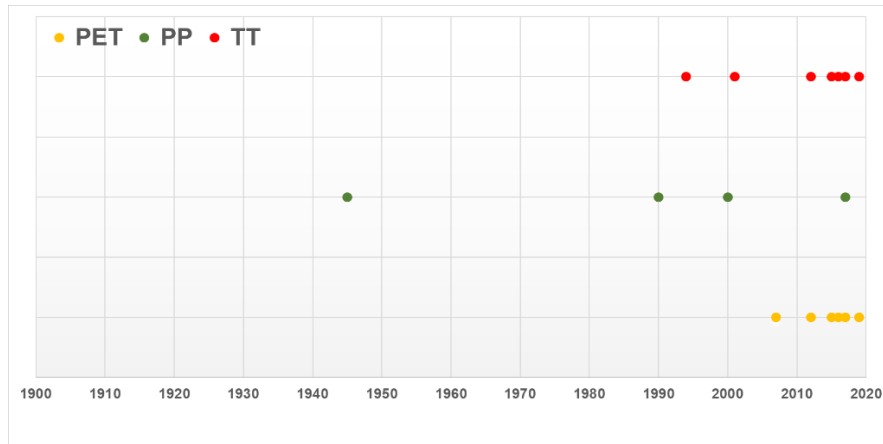

b)

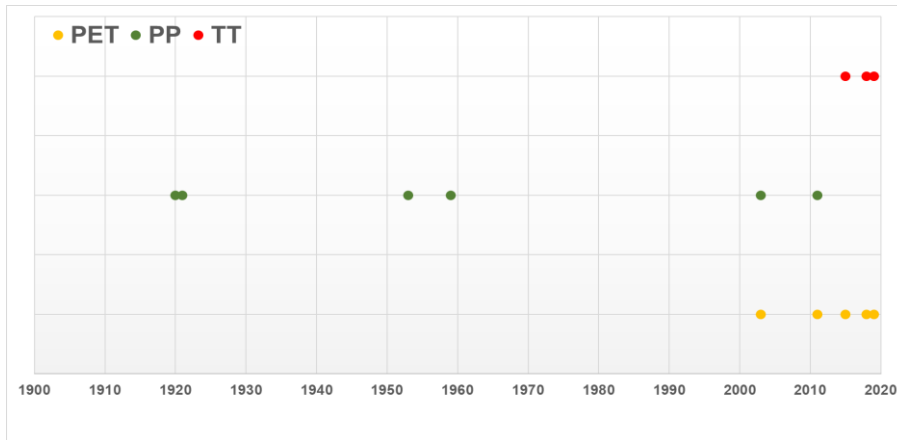

c)

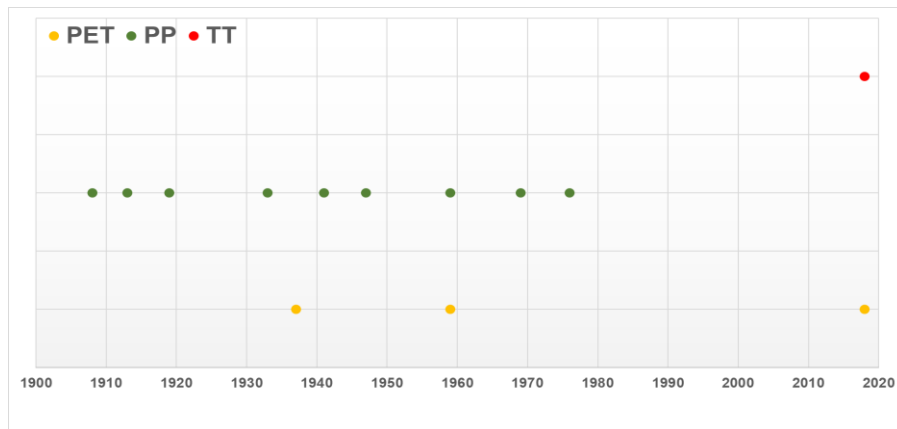

**Figure S11.** a) Occurrence of warm and dry events ( $TT_{90}/SPEI12_{10}$  – red dots), low precipitation and dry events ( $PP_{10}/SPEI12_{10}$  – green dots) and enhanced evaporation and dry events ( $PET_{90}/SPEI12_{10}$  – yellow dots) for MED area; b) as in a) but for CEU and c) as in a) but for NEU.  $TT_{90}/SPEI12_{10}$  indicates that we took into account the common years when the temperature was higher than the 90<sup>th</sup> percentile and SPEI12 was smaller than the 10<sup>th</sup> percentile.  $PP_{10}/SPEI12_{10}$  indicates that we took into account the common years when the precipitation was smaller than the 10<sup>th</sup> percentile and SPEI12 was smaller than the 10<sup>th</sup> percentile.  $PET_{90}/SPEI12_{10}$  indicates that we took into account the common years when the potential evapotranspiration was higher than the 90<sup>th</sup> percentile and SPEI12 was smaller than the 10<sup>th</sup> percentile.

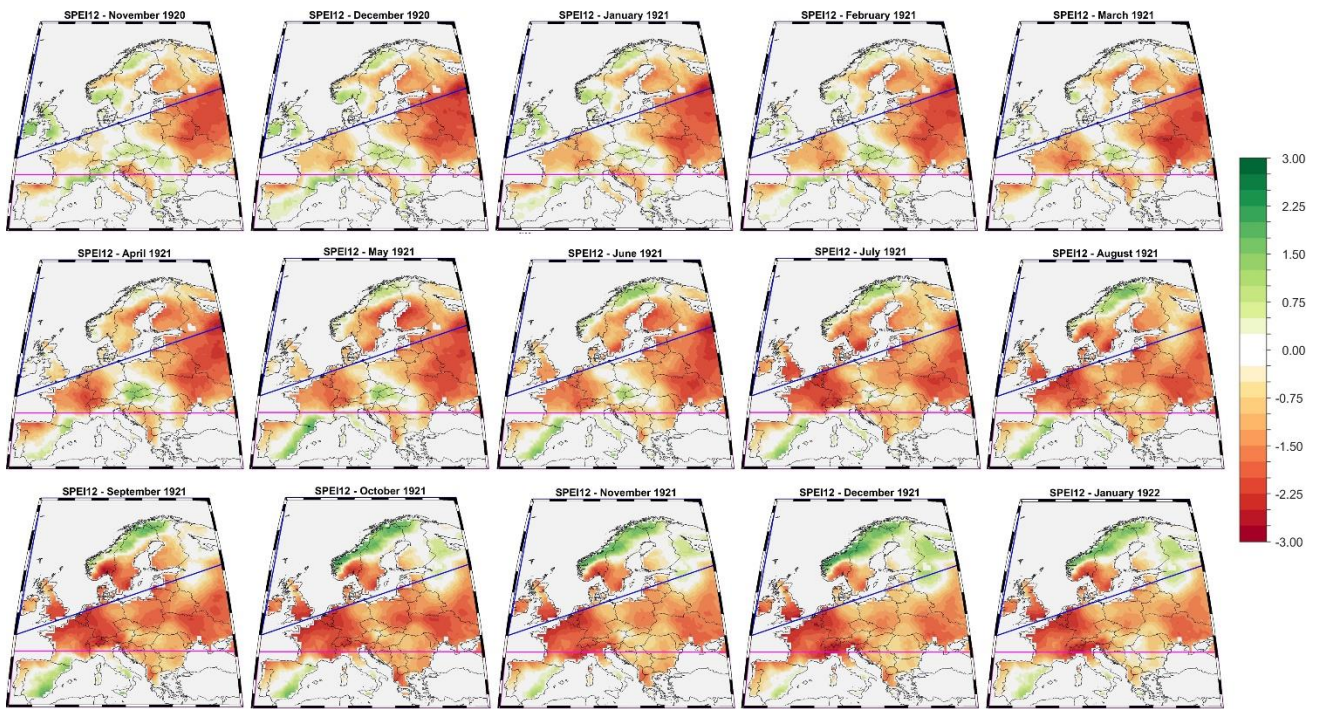

**Figure S12.** Spatial evolution of the SPEI12 between November 1920 until January 1922.

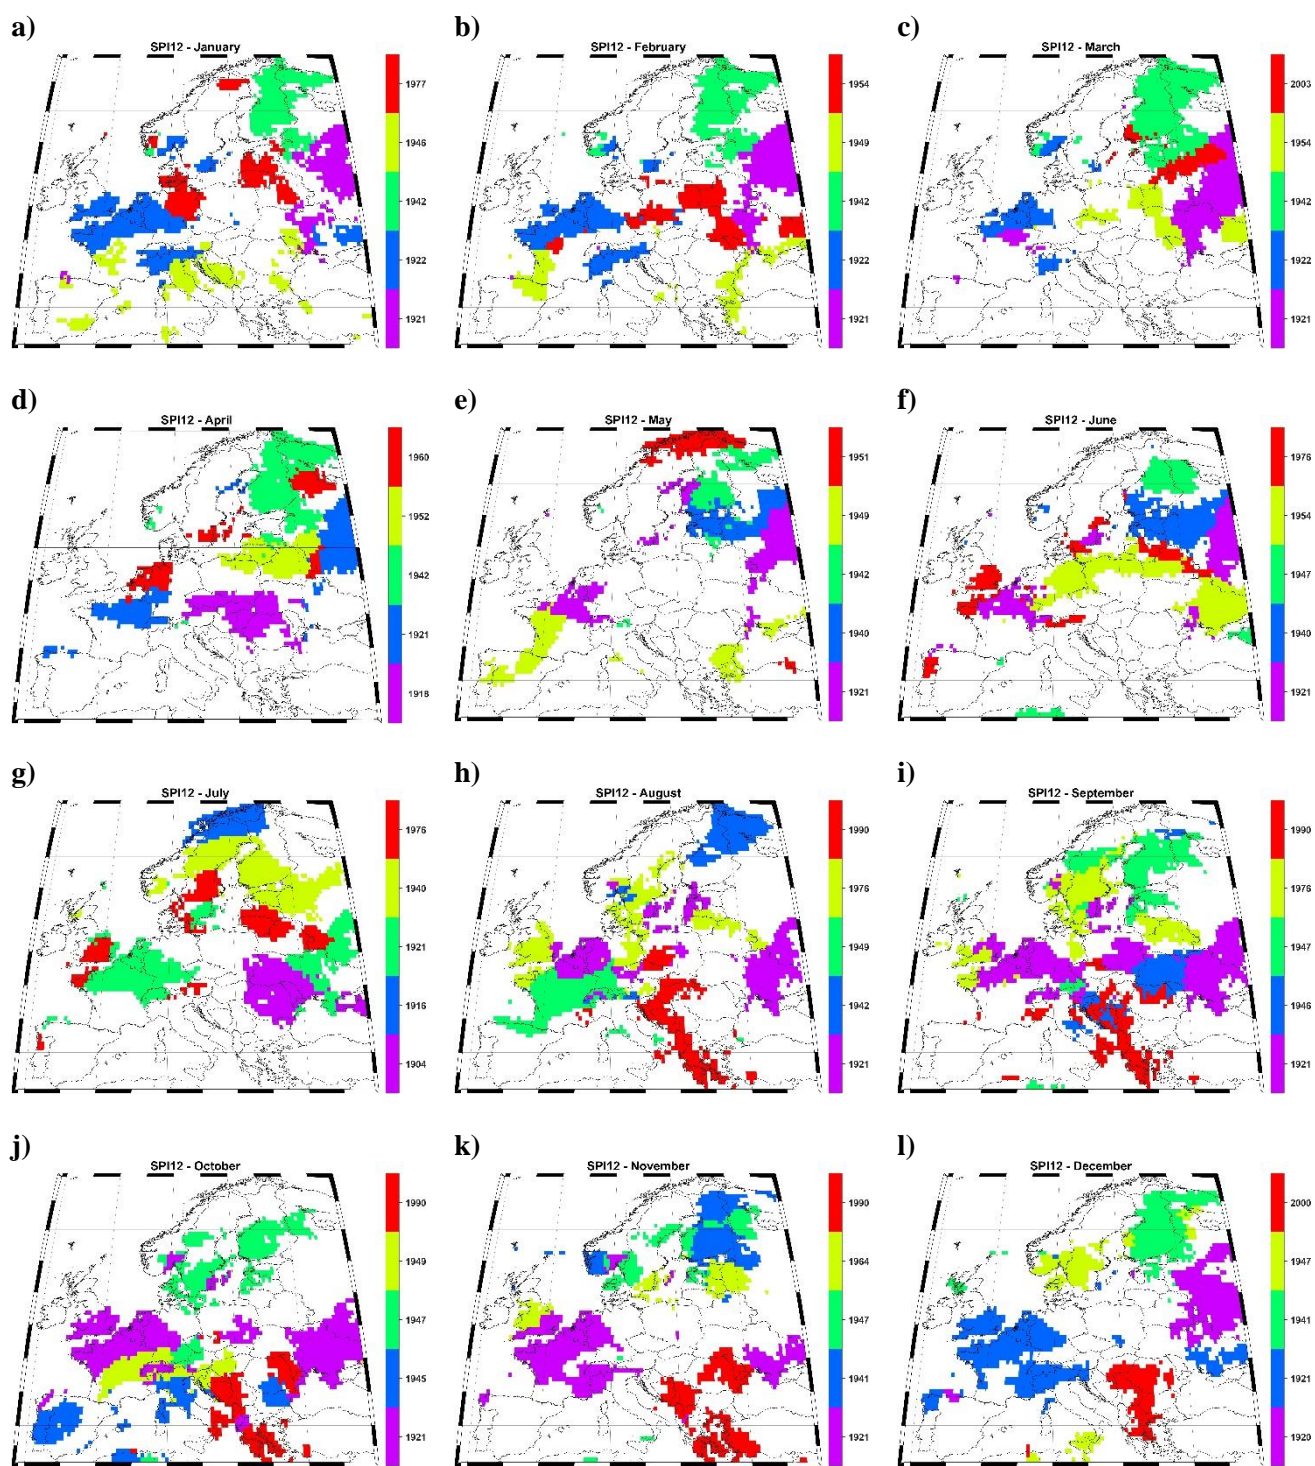

**Figure S13.** The spatial extent and the year of record of the driest years, based on the monthly SPI12, over Europe. Analyzed period: 1902–2019.

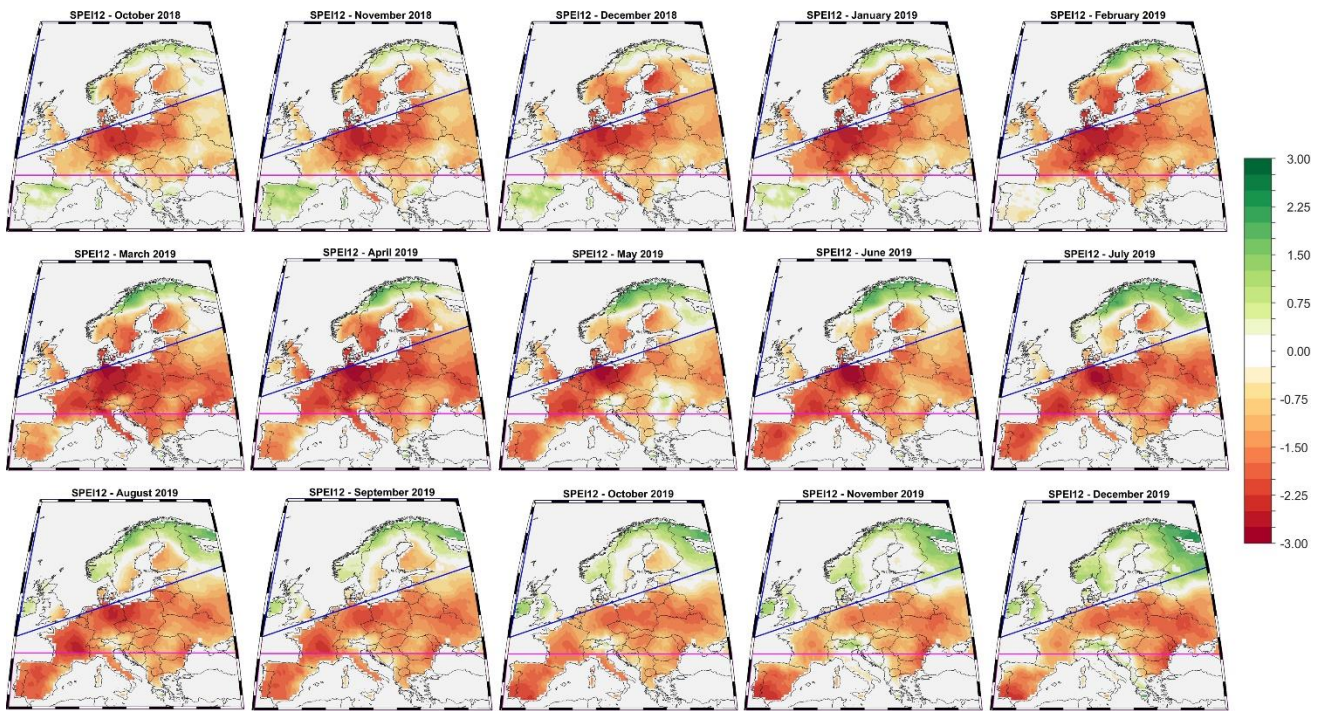

*Figure S14.* Spatial evolution of the SPEI12 between October 2018 until December 2019.



## References

Hamed, K. H. & Rao, A. R. A modified Mann-Kendall trend test for autocorrelated data. *Journal of Hydrology* **204**, 182–196 (1998).

Kendall, M.G., 1948. Rank Correlation Methods. Griffin, London

Mann, H. B., 1945. Nonparametric tests against trend. *Econometrica* **13**, 245–259.

NOAA: ETOPO1 1 Arc-Minute Global Relief Model, Cent. NOAA Natl. Geophys. Data [online] Available from: <https://www.ngdc.noaa.gov/mgg/global/> (Accessed 18 October 2020), 2009
